# Supplementary material for: An ice-sheet wide framework for englacial attenuation and basal reflection from ice penetrating radar data
Source: Copernicus journal article supplement (doi:10.5194/tc-2016-8), 2016-01-22
Supplement: Supplementary file [file tc-2016-8-RC2-supplement.pdf]

**Review:** “An ice-sheet wide framework for englacial attenuation and basal reflection from ice penetrating radar data”

T.M. Jordan, et al., *The Cryosphere*

Review by: Mike Wolovick

**Summary:**

This paper describes a semi-empirical method for estimating attenuation losses and bed reflectivity in radar data from continental ice sheets. The method uses a prior thermal model to estimate the spatial gradient in attenuation. Based on this spatial gradient, the method selects local regions that are expected to have broadly similar attenuation rates based on a segmentation approximation. Within each region, the thermal model is used to correct the observed bed-returned power for the local differences in attenuation relative to the mean for that region. The corrected bed-return power data are then fit with a least-squares linear best-fit representing the mean attenuation rate for that region. The residual to the fit represents the basal reflectivity.

The authors apply the method to the CReSIS radar dataset collected over the Greenland Ice Sheet for Operation IceBridge. They find that the method converges where ice thickness is variable and attenuation rates are high in the south and east of Greenland. In the north and west, as well as in the ice sheet interior, the method does not converge. They find a tradeoff between spatial coverage and precision, such that the area where the method is considered to have converged increases if one is willing to accept higher uncertainty. The output bed reflectivity estimates show a reduced spread consistent with the range of plausible subglacial materials. The authors also demonstrate that the estimated attenuation rates can be used to check the temperature bias in the original input models.

This manuscript is clearly relevant for *The Cryosphere*. The method developed by the authors represents an important advance in the integration of ice-penetrating radar data with ice sheet models. The authors demonstrate both how models can be used to guide the interpretation of radar data, and how the radar data can in turn be used to diagnose biases in those models. I have two major concerns, one relating to the inability of the model to converge in the ice sheet interior, and the other relating to the segmentation approximation. The first concern is actually an opportunity for the authors to expand

the scope of their results. I believe that they have been too conservative, and that in fact they can constrain reflectivity in the interior of Greenland even if they cannot also constrain attenuation. The second concern could be addressed by showing how the results respond to alternate means of choosing local sample regions.

## **Major Comments:**

### Ice Sheet Interior

The main weakness of the method developed by the authors is that it does not work in interior regions of Greenland where variations in ice thickness and attenuation rate are both low. In other words, the method doesn't work where the problem is easy! With little variability in ice thickness and relatively constant thermal structure, one could get good estimates of the basal reflectivity anomaly in interior Greenland by using no attenuation correction at all.

The reason why the authors' method does not converge in the interior of Greenland is one that the authors themselves identified: the variability in ice thickness is too low. Quantitatively, we can say that in order to get a good correlation between bed returned power and ice thickness, the following condition must hold:  $2B\Delta h > \Delta R$ , where  $B$  is the regional average attenuation rate,  $\Delta h$  is the standard deviation of ice thickness, and  $\Delta R$  is the standard deviation of bed reflectivity. When the variability in ice thickness is below this threshold, a local linear best-fit cannot constrain attenuation rate.

However, when the variability in ice thickness is low, the total attenuation losses should also be roughly constant. Attenuation therefore becomes less important, and it should be possible to estimate basal reflectivity anomalies even if attenuation cannot be constrained. Local variations in attenuation rate may still produce variability in total attenuation losses; however, the authors are already using a numerical model to estimate local variations in attenuation rate. The authors make a good case that the local gradient in attenuation rate from the models is more reliable than the mean value, so they can simply continue using the model to correct for local variations in attenuation rate. When the variability in ice thickness is low, the authors' method will be unable to constrain the regional mean attenuation rate, but it should still do a good job of estimating basal reflectivity, and the authors could present those reflectivity results in the interior of Greenland.

In order to capture regions where it is possible to constrain reflectivity but not attenuation, the

authors could introduce an alternate quality control check as a substitute for the  $r^2_{[Pc]}$  check they introduce in Section 2.7. When the variability in ice thickness is low compared to the variability in basal reflectivity ( $2B\Delta h < \Delta R$ ), the authors could check the standard deviation of bed reflectivity instead of  $r^2_{[Pc]}$ . The authors use the standard deviation of reflectivity as a check on the validity of their results anyway (Section 3.2), so it makes sense to formally add this metric to the quality control step. If the standard deviation of bed reflectivity is reasonable for subglacial materials, then the alternate quality control is passed and the authors can present results for reflectivity in that region.

### Segmentation Approximation

The segmentation approximation seems needlessly complex. The purpose of the segmentation approximation (Section 2.5) is to define a local region in which attenuation rate is roughly constant. Why not simply define an oval-shaped region where the RMS variability in attenuation rate is less than some threshold? Or why not simply define an irregular contiguous region containing all grid cells where the difference in attenuation rate is less than the threshold? With an ellipse, the unknowns at this step of the problem would be reduced to three: the orientation of the ellipse, the length of the major axis, and the length of the minor axis. With an irregular shape, no a priori assumptions about the nature of the ice sheet temperature field need to be made at all. Using an ellipse instead of the segmentation approximation would eliminate the sharp corners created along the segment boundaries in Figure 5f.

In addition, an ellipse or an irregular shape would drastically simplify Section 2.5. Nothing that the authors have presented indicates that the segmentation approximation is a particularly good representation of the ice sheet thermal structure. The segmentation approximation has no physical basis in ice dynamics or temperature that could justify the use of such a complex model. The only virtue of the segmentation approximation seems to be that it is capable of elongating perpendicular to the gradient of attenuation rate, but an ellipse or an irregular shape could do that too. In addition, the segmentation approximation is only capable of elongating at 45° angles, but an ellipse or irregular shape could elongate at any angle.

I do not believe that the awkwardness of the segmentation approximation invalidates the later results of this paper. It is likely that the authors would have achieved similar results with any reasonable method for selecting a local sample region based on the input thermal models. However, the unnecessary complexity of the segmentation approximation makes the paper harder to follow, has no realistic basis in ice sheet physics, and potentially contributes other artifacts into the results.

The supplemental material (Sections S1 and S2) explores the sensitivity of the sample regions produced by the segmentation approximation to the temperature model input (S1) and to the choice of RMS tolerance (S2). However, neither section addresses the sensitivity of later results to the segmentation approximation itself. I would like to see an exploration of how the results are affected by completely different means of choosing a local sample region. What happens if the segment boundaries are shifted by 22.5° (half a segment)? What happens if six segments are used instead of eight? What if an elliptical, a circular, or an irregular sample region is used? The authors need not address every single possible method of determining local sample regions, but I would like to see some exploration of the effects of using a segmentation approximation to choose local sample regions.

### **Minor Comments:**

Line 4: “...which is an exponential function of temperature.”

Attenuation is an Arrhenius function of temperature, not an exponential function.

Line 5 (and elsewhere): “stationarity”

I'm not sure I agree with the authors' use of the term “stationary”. Typically, “stationarity” refers to a time series whose statistical properties are constant over time, and that concept could be generalized to spatial data whose statistical properties are constant over space. However, the authors use “stationarity in the attenuation rate” to mean a constant attenuation rate. A constant is stationary, but not all stationary data are constant. In this case, the authors could be both easier to understand and more accurate by saying “constant” when they mean constant.

Lines 16-31: Several places in this paragraph could benefit from adding additional (often older) references.

ice thickness: add [*Bailey et al.*, 1964; *Evans and Robin*, 1966; *Robin et al.*, 1969; *Jankowski and Drewry*, 1981]

basal material properties: add [*Oswald and Robin*, 1973; *Peters et al.*, 2005]

internal layer structure: add [*Robin et al.*, 1969; *Conway et al.*, 1999, 2002; *Vaughan et al.*, 1999; *Fahnestock et al.*, 2001; *Dahl-Jensen et al.*, 2003; *Ng and Conway*, 2004; *Tikku et al.*, 2004]

new data products for bed elevation and ice thickness: add [*Morlighem et al.*, 2014]

Additional uses of radar data that could be added to this paragraph:

ice rheology: [*Raymond*, 1983; *Hindmarsh et al.*, 2011; *Kingslake et al.*, 2014]

grounding line dynamics: [*Conway et al.*, 1999; *Catania et al.*, 2006; *Christianson et al.*, 2013]

basal melting or freezing: [*Fahnestock et al.*, 2001; *Catania et al.*, 2010; *Bell et al.*, 2011]

ice dynamic changes: [*Conway et al.*, 2002; *Bingham et al.*, 2015]

Line 33:

add [*Oswald and Robin*, 1973]

Line 38: “Arrhenius models where the attenuation rate is an exponential function of **inverse** temperature”

Line 45: “...make the implicit assumption...”

In some papers, the assumption is explicit. Maybe just say “...make the assumption...”

Line 45: “locally stationary”

See my comment above. “Locally stationary” is an oxymoron; stationarity implies that statistical properties are globally constant. Use “locally constant” here instead.

Line 53: “A central feature of our algorithm is the use of a prior Arrhenius model estimation of the attenuation rate as an initial condition.”

The use of the phrase “initial condition” is incorrect here. Initial conditions apply to models that predict the evolution of some variable over time. A better term would be “first guess”, “initial guess”, or “initial estimate”.

Lines 54-55: “Conceptually, the initial condition is used to estimate regions where the assumption of stationarity is valid within some specified tolerance.”

Removing “stationarity” can clean up this sentence: “The initial estimate is used to determine regions where attenuation rate is approximately constant to within some specified tolerance.”

Line 158: “...exponential dependence upon **inverse** temperature...”

Line 160, 164 (and possibly elsewhere):

Be careful about MacGregor et al., [2015a] versus MacGregor et al., [2015b]. I'm pretty sure you mean the second one in this context.

Lines 165-172:

Somewhere in here would be a good place to indicate that brackets  $\langle X \rangle$  indicate the depth-averaged value of X.

Lines 173-181:

For completeness, it would be a good idea to state how big of an effect you expect to see from climate transitions in Greenland. The MacGregor et al., [2012] reference refers to East Antarctica, where climate transitions have both a smaller signal in ice chemistry and are more closely spaced in depth than in Greenland. In Greenland, the stratigraphic chemistry changes are dominated by the Holocene-LGM transition, which occurs at wildly different depths in southern and northern Greenland [MacGregor et al., 2015]. The difference in depth of the Holocene-LGM transition with respect to the warm ice near the bed might be expected to produce a large difference in attenuation rate between northern Greenland and southern Greenland.

Lines 190-191:

Simplify this sentence to: “For the majority of the IPR data coverage region, GISM has lower temperature and therefore lower attenuation rate than SICOPOLIS (Fig. 4c).”

Line 215

There is an extra parenthesis inside the square root sign.

Lines 216 and 217

The averaging brackets  $\langle \rangle$  are in the wrong place. As written, the square root cancels the square and the expression reduces to the absolute value of the difference. The brackets should go outside of the squared difference. The expression inside the square root sign should be:  $\langle (B_{\infty}(x,y) - B_{\infty}(x_0,y_0))^2 \rangle$  (and

likewise for the second expression).

The alternate possibility is that the averaging brackets represent column-averages, not areal averages. In that case, the expressions reduce to the absolute value of the difference.

Lines 208-217

This paragraph is very confusing. It sounds like the authors assume only radial dependence within each segment, but later, the sample region boundaries (Figure 5f) clearly show a dependence on angle even within each segment. This is because the region boundaries are interpolated from the central radius vector for each segment along a circular arc, in order to produce continuous (but not differentiable) window boundaries. It would be helpful to state somewhere in this paragraph that the ultimate goal is to produce a variable radial length of the target window by interpolating with respect to angle.

Equations 6 and 7:

Move the constant terms outside of the integral and simplify them to  $2/R_n^2$ .

As written, the RMS is also a function of  $\theta_n$ .

Lines 237-239:

See my major comment above. If the gradient of ice thickness with distance is small, it should be easy to estimate bed reflectivity, because the mean attenuation rate has little effect on total attenuation. Variations in total attenuation only arise from variations in the attenuation rate, and the method the authors develop relies on an a priori model to correct for local variations in depth-averaged attenuation anyway.

Lines 259-261:

Most readers probably know this already, but it still might be helpful to explicitly state that crevasse scattering is most likely to cause problems for radar analysis of basal conditions in fast-flowing regions near the ice sheet margin.

Lines 279-282:

Simplify this statement. This step corrects for the difference in attenuation rate between the

measurement point and the central point.

Lines 283-287:

Why are thinner ice columns warmer, and thicker ice columns colder? On the one hand, conductive cooling should tend to produce warmer conditions in thicker ice. Most people reading this paper would probably assume that thick=warmer and thin=colder. On the other hand, the Peclet number ( $Pe=ah/\kappa$ ) indicates that thicker ice columns should have a greater dominance of advection over diffusion, and therefore the cooling effect of surface accumulation should be greater in thick ice. In addition, ice must flow faster (with a higher driving stress) in thin regions, producing more shear heating. Finally, low surface elevations tend to have a higher surface temperature because of the atmospheric lapse rate, but this effect should not influence local temperature differences due to bed topography. Which one of these mechanisms is responsible for producing the thick=colder, thin=warmer association?

Section 2.7

State the two criteria in words at the beginning of this section. Something like, “As a quality control check, we are looking for regions where (1) the correlation between ice thickness and bed-returned power is good, and (2) the correlation between ice thickness and bed reflectivity is poor.”

Lines 349-350:

Why were the field seasons processed independently, if Lines 81-83 stated that power measurements from different field seasons could be combined?

Section 3.2:

State the definition of “convergence” up front. The reader has to wait until the last paragraph (Line 415) to learn that convergence means “a normally distributed difference centered on zero”.

Lines 413-421:

The first sentence of this paragraph should state that the algorithm converges in southern and eastern Greenland, but not northern or western Greenland. The reader should not have to flip back and forth to the figures to determine where the basin numbers are located spatially.



Line 437: “A gridded map of the basal reflection coefficient...is shown in Fig. 11a.”

Figure 11a does not look like a “gridded map”. I realize that technically it is gridded at 1km cell size, but for all intents and purposes Figure 11a shows reflection coefficients along-track.

Lines 504-508:

It would be appropriate to mention here that the relationship between attenuation rate and temperature is highly nonlinear, so the difference in depth-averaged attenuation rate does not transfer neatly to a difference in depth-averaged temperature.  $\text{mean}(x^2) \neq \text{mean}(x)^2$ .

Section 4: Conclusions

This section should have a paragraph commenting on and interpreting the reflectivity results. From Figure 11, it appears that high reflectivity is concentrated in the approach to fast-flowing outlet glaciers. This is consistent with distributed hydrological networks or with saturated subglacial till, either of which would promote faster sliding.

Line 542-543: “We suggest that the converged radar algorithm attenuation solution is preferable to using a forward Arrhenius temperature model to calculate basal reflection coefficients.”

Strengthen and clarify this conclusion: “We find that our data-based attenuation algorithm is superior to an attenuation correction calculated purely from an a priori temperature model.”

Lines 546-548: “Notably, we demonstrated that even a small constant bias in the attenuation rate across a region; (this could be either with respect to a “true” value or another modelled value), leads to a thickness correlated bias in attenuation loss and therefore the basal reflection coefficients.”

This sentence is awkward. Rephrase as: “We demonstrated that even a small regional bias in attenuation rate leads to thickness-correlated errors in attenuation losses and therefore the basal reflection coefficients. These thickness-correlated errors persist regardless of whether the regional bias is with respect to the 'true' value or to another modelled value.”

Lines 562-564:

Is interpolation of bed reflectivity onto a regular grid even desirable, given that subglacial hydrology and geomorphology are likely to vary at scales much smaller than the grid spacing?

Lines 566-569: “Due to this lower spatial variability, (and despite the caveats in the paragraph above), these regions [ice sheet interiors] could potentially have their basal reflection values derived by using forward Arrhenius temperature model for the attenuation.”

See my major comments above. When ice thickness has little variability, errors in the regional mean attenuation rate have little effect. Only the spatial gradients in attenuation rate matter, and as the authors point out earlier in the conclusion, the models do a better job representing these than they do at representing the mean value. The authors should have been able to take advantage of this fact to produce reflectivity estimates in the ice sheet interior.

### **Figures:**

In general, the figures need better subplot titles and labeling. Symbols without words are inappropriate for subplot or axes labels because symbols are hard for readers to understand without flipping back and forth to the places where those symbols are defined. The subplot titles should express their meaning in words, and the corresponding symbols can be given in the caption if necessary. Many of the figures also need to be larger to permit more detail and wordier labels. Units should be placed on colorbar labels, not in subplot titles.

For most of the figures, I've given my suggestions for more descriptive titles and labels. The authors need not follow these specific suggestions, but all of the subplot titles should use descriptive words rather than symbols.

### Figure 1

Subplot titles:

- a) Flight Tracks
- b) Drainage Basins

Put the numbers for the drainage basins in (b) arrayed around the coast of Greenland, rather than all together in the key. That way it is easier to tell at a glance which number refers to which basin. Also, it might be a good idea to circle or otherwise highlight the four basins in which the algorithm converges.

### Figure 3

Subplot titles:

- a) Good Return
- b) Bad Return

Y-axis label: What does “linear units” mean, other than “not decibels”? Either convert to actual units of power (W or  $Wm^{-2}$ ), express as a fraction of the transmit power, or normalize so that the peak in each plot is 1. Normalization may be the best option, so that the quality control check (decays to 2% of peak power) can be easily visualized.

State where the two examples were taken from in the caption.

### Figure 4

Subplot titles:

- a) Arrhenius Model for Attenuation Rate
- b) Attenuation Rate from GISM
- c) Difference between GISM and SICOPOLIS

The y-axis label in plot (a) should say the words “Attenuation Rate”.

The colorbars should be labeled with their units (dB/km).

It might be appropriate to include a map for SICOPOLIS itself, in addition to the difference map.

### Figure 5

subplots:

- a) Model Estimated Attenuation Rate
- b) Segments
- c) Segment Approximation of Model Estimate
- d) Difference from Central Value
- e) Segment Approximation of Difference
- f) Window Boundaries

The units should be given next to the colorbars, not in the subplot titles. The colorbars should have a larger font size as well.

Don't the square root and square cancel in plot (d)? Isn't that plot just showing the absolute value of the

difference?

The same comment that I made about lines 216 and 217 applies to the expressions in the caption.

Either the averaging brackets are in the wrong place, or the expressions reduce to the absolute value of the difference.

### Figure 6

Subplots:

- a) Vector R1
- b) Vector R2
- c) Vector R3
- d) Vector R4

Colorbar label should be “Length (km)”

### Figure 7

Plot title: “Attenuation Difference Correction”

It is more accurate to refer to the process shown in this figure as the attenuation difference correction, rather than the attenuation correction. The step only corrects for the difference in attenuation rate between the data location and the central point.

### Figure 8

Subplots:

- a) Correlation Between Power and Ice Thickness ( $r^2_{[Pc]}$ )
- b) Correlation Between Reflectivity and Ice Thickness ( $r^2_{[R\omega]}$ )
- c) Correlation Ratio ( $r^2_{[ratio]}$ )
- d) Coverage
- e) Attenuation Rate
- f) Attenuation Loss

Put units (dB, dB/km) in the colorbar labels.

Put plots a-c on the same color scale.

Note in caption whether high values or low values are good in a-c. In (a) and (c), high values indicate the algorithm converged, but in (b) low values indicate convergence.

### Figure 9

Subplots:

- a) Difference between Model Inputs
- b) Difference between Algorithm Outputs
- c) Attenuation Rate Difference Distribution
- d) Attenuation Rate Difference vs Ice Thickness
- e) Attenuation Loss Difference Distribution
- f) Attenuation Loss Difference vs Ice Thickness

Add units to the colorbar.

Label important outlet glaciers in either (a) or (b). Helheim Glacier is in view here, for example.

Note in the caption what the reader should be looking for in terms of convergence: in plots (c) and (e), a normally distribution about zero indicates convergence, while in (d) and (f), a lack of systematic ice thickness dependence indicates convergence.

### Figure 10

Plot title: Attenuation Rate

Label colorbar with the units.

As in Figure 9, label important outlet glaciers, including Helheim. Also put an inset box showing the area of detail in Figure 11.

### Figure 11

Subplots:

- a) fine as is
- b) Reflectivity Distribution
- c) Reflectivity vs Ice Thickness

Put units on the colorbar label. Label the outlet glacier(s) in the lower right of (a). Note in the caption that a range of approximately 20 dB in (b) is right for plausible subglacial materials, and that a lack of systematic ice thickness dependence in (c) indicates algorithm convergence.

### Figure 12

Subplots:

- a) Attenuation Rate Difference Distribution
- b) Attenuation Loss Difference Distribution
- c) fine as is

Note in the caption that green is a subset of red, which is a subset of blue.

### Figure 13

Subplots:

- a) Difference Between Prior Model and Radar Estimate (GISM)
- b) Difference Between Prior Model and Radar Estimate (SICOPOLIS)
- c) Comparison Between Models and Dye3 Ice Core

Add units to the colorbar labels.

### **Supplemental Material:**

Line 33: "...the sample regions will contain individual ice columns..."

Replace "individual ice columns" with "grid cells".

Lines 43-45: "If this is rescaled by ice thickness for a sample region in the interior of the ice sheet (mean ice thickness ~2500m) this results in a desired attenuation rate accuracy ~1 dBkm<sup>-1</sup>."

This explanation is very simple and should go in the main text.

Lines 69-70:

Mention that basins 3, 4, 5, and 6 are all located in south and east Greenland.

Figures:

Same comments as for the figures in the main text. All of these figures need better subplot titles and units labelled on the colorbars.

### **References:**

- Bailey, J. T., S. Evans, and G. de Q. Robin (1964), Radio echo sounding of polar ice sheets, *Nature*, 204(4957), 420–421, doi:10.1038/204420a0.
- Bell, R. E. et al. (2011), Widespread persistent thickening of the East Antarctic Ice Sheet by freezing from the base, *Science*, 331(6024), 1592–1595, doi:10.1126/science.1200109.
- Bingham, R. G., D. M. Rippin, N. B. Karlsson, H. F. J. Corr, F. Ferraccioli, T. A. Jordan, A. M. Le Brocq, K. C. Rose, N. Ross, and M. J. Siegert (2015), Ice-flow structure and ice dynamic changes in the Weddell Sea sector of West Antarctica from radar-imaged internal layering, *J. Geophys. Res. Earth Surf.*, 120(4), 655–670, doi:10.1002/2014JF003291.
- Catania, G., C. Hulbe, and H. Conway (2010), Grounding-line basal melt rates determined using radar-derived internal stratigraphy, *J. Glaciol.*, 56(197), 545–554, doi:10.3189/002214310792447842.
- Catania, G. A., H. Conway, C. F. Raymond, and T. A. Scambos (2006), Evidence for floatation or near floatation in the mouth of Kamb Ice Stream, West Antarctica, prior to stagnation, *J. Geophys. Res. Earth Surf.*, 111(F1), F01005, doi:10.1029/2005JF000355.
- Christianson, K., B. R. Parizek, R. B. Alley, H. J. Horgan, R. W. Jacobel, S. Anandkrishnan, B. A. Keisling, B. D. Craig, and A. Muto (2013), Ice sheet grounding zone stabilization due to till compaction, *Geophys. Res. Lett.*, 40(20), 5406–5411, doi:10.1002/2013GL057447.
- Conway, H., B. L. Hall, G. H. Denton, A. M. Gades, and E. D. Waddington (1999), Past and future grounding-line retreat of the West Antarctic Ice Sheet, *Science*, 286(5438), 280–283, doi:10.1126/science.286.5438.280.
- Conway, H., G. Catania, C. F. Raymond, A. M. Gades, T. A. Scambos, and H. Engelhardt (2002), Switch of flow direction in an Antarctic ice stream, *Nature*, 419(6906), 465–467, doi:10.1038/nature01081.
- Dahl-Jensen, D., N. Gundestrup, S. P. Gogineni, and H. Miller (2003), Basal melt at NorthGRIP modeled from borehole, ice-core and radio-echo sounder observations, *Ann. Glaciol.*, 37(1), 207–212, doi:10.3189/172756403781815492.
- Evans, S., and G. de Q. Robin (1966), Glacier depth-sounding from the air, *Nature*, 210(5039), 883–885, doi:10.1038/210883a0.
- Fahnestock, M., W. Abdalati, I. Joughin, J. Brozena, and P. Gogineni (2001), High geothermal heat flow, basal melt, and the origin of rapid ice flow in central Greenland, *Science*, 294(5550), 2338–2342, doi:10.1126/science.1065370.
- Hindmarsh, R. C. A., E. C. King, R. Mulvaney, H. F. J. Corr, G. Hiess, and F. Gillet-Chaulet (2011), Flow at ice-divide triple junctions: 2. Three-dimensional views of isochrone architecture from ice-penetrating radar surveys, *J. Geophys. Res. Earth Surf.*, 116(F2), F02024, doi:10.1029/2009JF001622.
- Jankowski, E. J., and D. J. Drewry (1981), The structure of West Antarctica from geophysical studies,

*Nature*, 291(5810), 17–21, doi:10.1038/291017a0.

- Kingslake, J., R. C. A. Hindmarsh, G. Adalgeirsdottir, H. Conway, H. F. J. Corr, F. Gillet-Chaulet, C. Martin, E. C. King, R. Mulvaney, and H. D. Pritchard (2014), Full-depth englacial vertical ice sheet velocities measured using phase-sensitive radar, *J. Geophys. Res. Earth Surf.*, 119(12), 2604–2618, doi:10.1002/2014JF003275.
- MacGregor, J. A., M. A. Fahnestock, G. A. Catania, J. D. Paden, S. Prasad Gogineni, S. K. Young, S. C. Rybarski, A. N. Mabrey, B. M. Wagman, and M. Morlighem (2015), Radiostratigraphy and age structure of the Greenland Ice Sheet, *J. Geophys. Res. Earth Surf.*, 120(2), 212–241, doi:10.1002/2014JF003215.
- Morlighem, M., E. Rignot, J. Mouginot, H. Seroussi, and E. Larour (2014), Deeply incised submarine glacial valleys beneath the Greenland ice sheet, *Nat. Geosci.*, 7(6), 418–422, doi:10.1038/ngeo2167.
- Ng, F., and H. Conway (2004), Fast-flow signature in the stagnated Kamb Ice Stream, West Antarctica, *Geology*, 32(6), 481–484, doi:10.1130/G20317.1.
- Oswald, G. K. A., and G. D. Q. Robin (1973), Lakes beneath Antarctic Ice Sheet, *Nature*, 245(5423), 251–254, doi:10.1038/245251a0.
- Peters, M. E., D. D. Blankenship, and D. L. Morse (2005), Analysis techniques for coherent airborne radar sounding: Application to West Antarctic ice streams, *J. Geophys. Res. Solid Earth*, 110(B6), B06303, doi:10.1029/2004JB003222.
- Raymond, C. (1983), Deformation in the vicinity of ice divides, *J. Glaciol.*, 29(103), 357–373.
- Robin, G. D. Q., S. Evans, and J. T. Bailey (1969), Interpretation of radio echo sounding in polar ice sheets, *Philos. Trans. R. Soc. Lond. Math. Phys. Eng. Sci.*, 265(1166), 437–505, doi:10.1098/rsta.1969.0063.
- Tikku, A. A., R. E. Bell, M. Studinger, and G. K. C. Clarke (2004), Ice flow field over Lake Vostok, East Antarctica inferred by structure tracking, *Earth Planet. Sci. Lett.*, 227(3-4), 249–261, doi:10.1016/j.epsl.2004.09.021.
- Vaughan, D. G., H. F. J. Corr, C. S. M. Doake, and E. D. Waddington (1999), Distortion of isochronous layers in ice revealed by ground-penetrating radar, *Nature*, 398(6725), 323–326, doi:10.1038/18653.
